# Supplementary material
Source: PubMed Central journal article supplement (PMC421614)

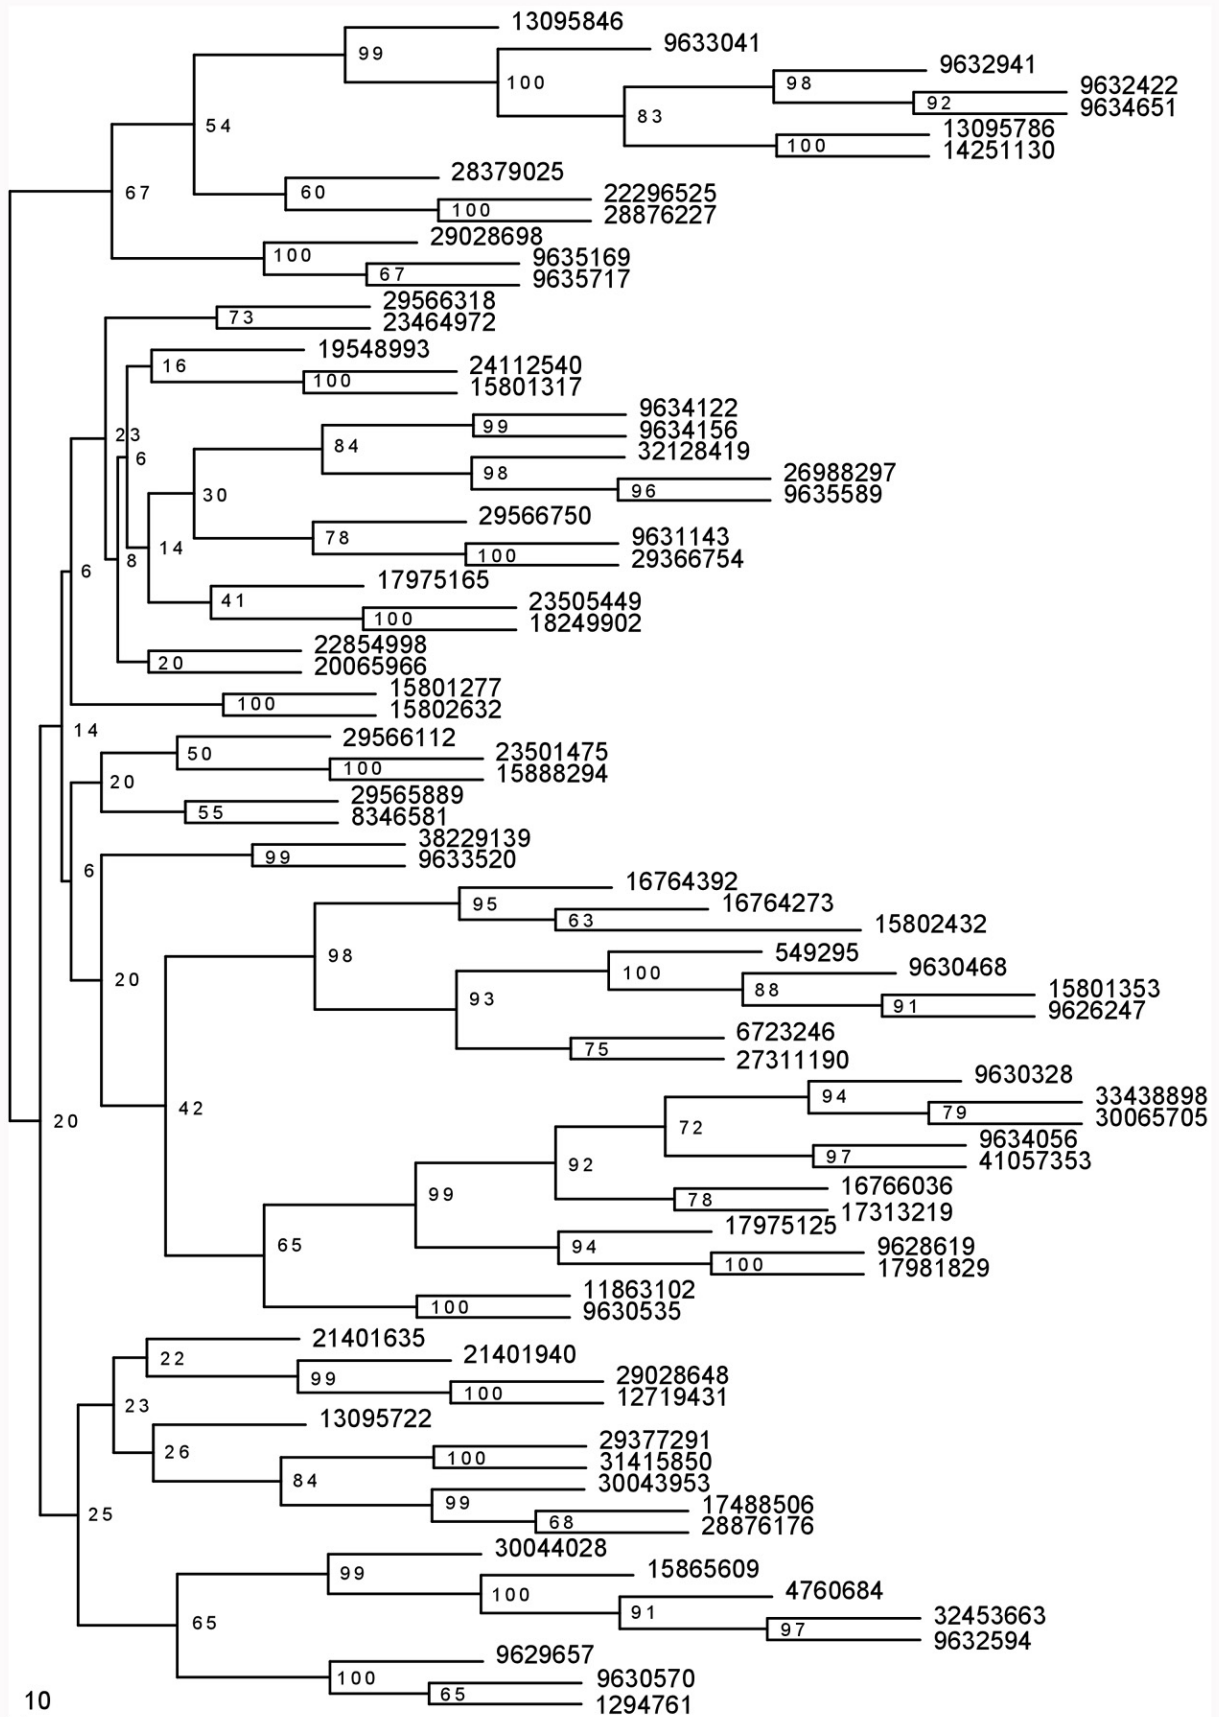

leaves are labeled with the gi number of the corresponding prohead protease

Supplement: jbacter_186_13_4369__1.pdf [file jbacter_186_13_4369__1.pdf]
